# Supplementary material
Source: ML conference proceedings conference paper supplement (https://www.ecva.net/papers/eccv_2020/papers_ECCV/html/123670528_ECCV_2020_paper.php)
Supplement: Supplementary file 2 [file 123670528-supp.zip]

# Generate Admissible Functions using DOPbox

Matthew Harker and Paul O’Leary  
Institute for Automation  
University of Leoben  
A-8700 Leoben, Austria  
URL: [automation.unileoben.ac.at](http://automation.unileoben.ac.at)

Original: January 9, 2013

© 2013

Last Modified: April 11, 2013

## Contents

|          |                                                                         |          |
|----------|-------------------------------------------------------------------------|----------|
| <b>1</b> | <b>Synthesize Admissible Functions</b>                                  | <b>2</b> |
| <b>2</b> | <b>Solve the Differential Equation</b>                                  | <b>4</b> |
| <b>3</b> | <b>The spectrum of the Eigenvectors w.r.t. the Admissible Functions</b> | <b>5</b> |

This function demonstrates the use of the DOPbox for the generation of admissible functions for a BVP and for the solution of the BVP, more details on this method can be found in [1].  
prepare tghe matlab environment

```
1 close all;
2 clear;
3 setUpGraphics;
```

## 1 Synthesize Admissible Functions

Define the number of points and the number of basis functions to be generated.

```
4 noPts = 100;
5 noBfs = 15;
6 %
7 % Generate the vector of x values at which the problem is to be solved
8 %
9 x = linspace(0,1,noPts)';
10 %
11 % Synthesize the basis functions
12 %
13 [B, dB] = dop( x , noBfs );
14 %
15 % generate a local differentiating matrix
16 %
17 ls = 3;
18 noBfsD = ls;
19 D = dopDiffLocal( x, ls, noBfsD );
20 %
21 % Compute the second derivative
22 %
23 D2 = D * D;
24 D3 = D2 * D;
25 %-----
26 % Define the constraints
27 %
28 % 1) Position constraint
29 c1 = zeros( noPts, 1);
30 c1(1) = 1;
31 %
32 % 2) derivative constraint
33 c2 = D(1,:)';
34 %
35 % 3) second derivatice constraint
36 c3 = D2(end,:)';
37 %
38 % 4) a positional constraint at 0.7
39 c4 = zeros( noPts, 1 );
```

```

40 frac = 0.7;
41 at = round( noPts * frac );
42 c4( at ) = 1;
43 %
44 c5 = D3(end,:)' ;
45 %
46 % form the constraint matrix
47 %
48 C = [c1, c2, c3, c4, c5];
49 %
50 % Synthesize the admissible functions
51 %
52 Bc = dopConstrain( C, B );
53 %
54 % plot the first three admissible functions
55 %
56 fig1 = figure;
57 for k=1:3
58     plot( x, Bc(:,k), 'k' );
59     hold on;
60 end;
61 title('Admissible Functions for the BVP');
62 xlabel('x');
63 ylabel('y(x)');
64 grid on;

```

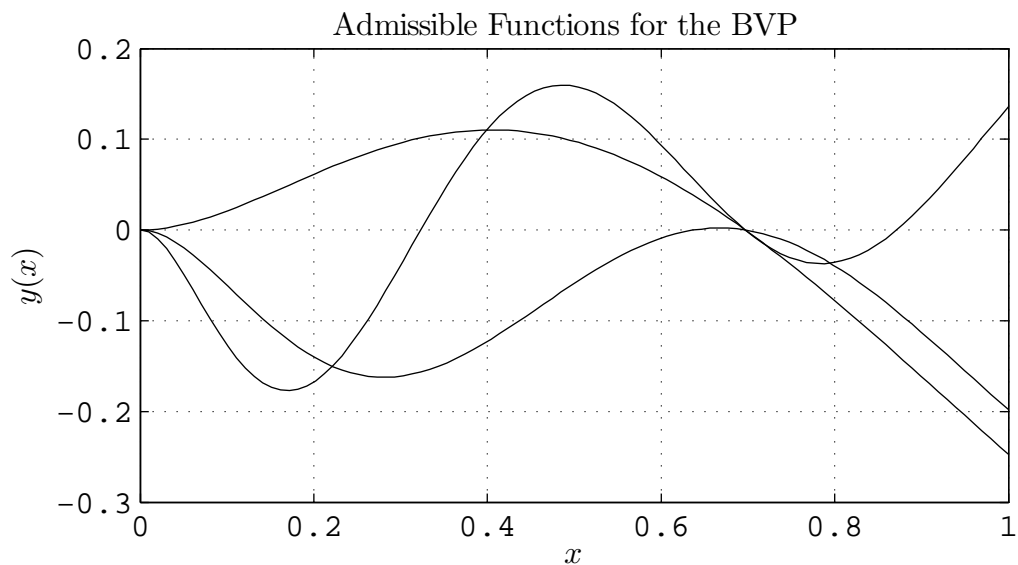

Figure 1: The first three admissible functions.

## 2 Solve the Differential Equation

Define the linear differential operator.

```
65 L = Bc' * D^4 * Bc;
66 %
67 % Compute the eigenvalues and eigenvectors
68 %
69 [vec, val] = eig( L );
70 %
71 % Sort the eigenvalues and vectors in assending order.
72 %
73 [val, inds] = sort( diag(val) );
74 vec = vec(:,inds);
75 %
76 % Compute the solution vectors from the spectrum.
77 %
78 solV = Bc * vec;
79 %
80 % Plot the solution vectors
81 %
82 fig2 = figure;
83 for k=1:3
84     plot( x, solV(:,k), 'k');
85     hold on;
86 end;
87 title('Solution to BVP');
88 xlabel('x');
89 ylabel('y(x)');
90 grid on;
```

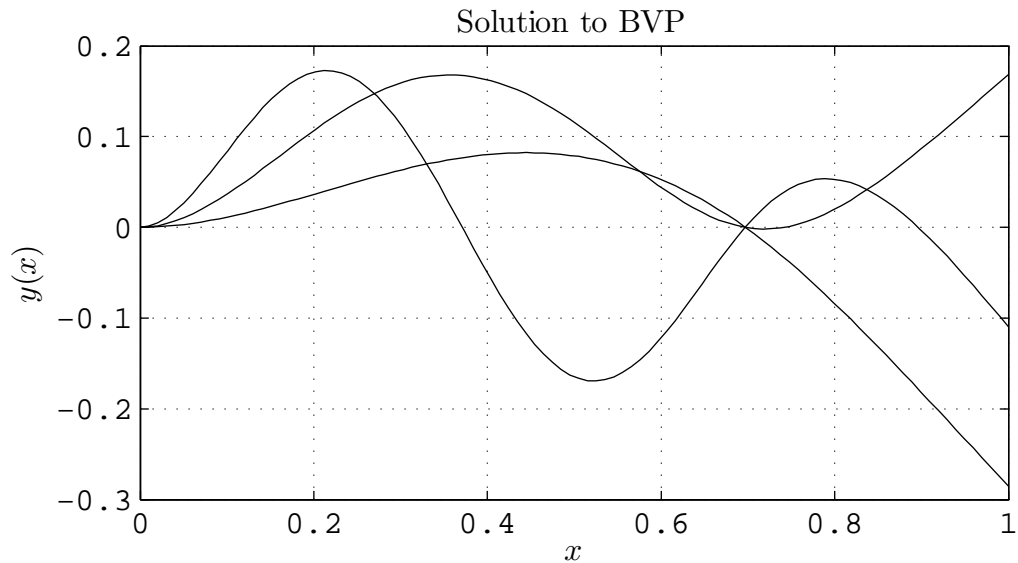

Figure 2: Eigenvectors for the Boundary Value Problem.

### 3 The spectrum of the Eigenvectors w.r.t. the Admissible Functions

The method implemented here is a discrete equivalent of a Rayleigh-Ritz method. The constrained polynomials are used for the series approximation. The `vec` matrix contains the spectrum. Only the spectrum of the first 4 eigenvectors w.r.t. the first 10 basis functions are displayed here.

```
91 disp('The spectrum of the first 4 eigenvectors with respect to the first
    ');
92 disp('10 basis functions');
93 vec(1:10,1:4)
```

The spectrum of the first 4 eigenvectors with respect to the first 10 basis functions

ans =

|         |         |         |         |
|---------|---------|---------|---------|
| 0.9790  | 0.1863  | 0.0260  | -0.0002 |
| 0.2021  | -0.9539 | -0.2252 | -0.0505 |
| -0.0282 | 0.2332  | -0.9354 | -0.1464 |
| -0.0011 | 0.0063  | -0.2500 | 0.8095  |
| 0.0037  | -0.0274 | 0.0906  | 0.5598  |
| 0.0021  | -0.0131 | 0.0525  | 0.0796  |
| -0.0000 | 0.0005  | 0.0012  | 0.0235  |
| 0.0007  | -0.0043 | 0.0120  | 0.0225  |
| 0.0004  | -0.0022 | 0.0059  | 0.0069  |
| 0.0000  | -0.0001 | -0.0002 | -0.0032 |

## References

- [1] Paul O’Leary and Matthew Harker. A framework for the evaluation of inclinometer data in the measurement of structures. *IEEE T. Instrumentation and Measurement*, 61(5):1237–1251, 2012.
