# Supplementary material
Source: ML conference proceedings conference paper supplement (https://www.ecva.net/papers/eccv_2020/papers_ECCV/html/123670528_ECCV_2020_paper.php)
Supplement: Supplementary file 4 [file 123670528-supp.zip]

# Surface Reconstruction from Gradient Fields: **grad2Surf**

## Version 1.0

Matthew Harker and Paul O’Leary  
Institute for Automation  
University of Leoben  
A-8700 Leoben, Austria  
URL: automation.unileoben.ac.at

Original: Aug. 20, 2013  
© 2013

Last Modified: August 20, 2013

## Contents

|   |                                                                             |   |
|---|-----------------------------------------------------------------------------|---|
| 1 | Introduction                                                                | 1 |
| 2 | Global Least Squares Solution                                               | 2 |
| 3 | Spectral Regularization, Constrained Regularization, Weighted Least Squares | 5 |
| 4 | Tikhonov Regularization                                                     | 8 |

## 1 Introduction

The Gradient-to-Surface Toolbox, **grad2Surf**, is a MATLAB toolbox for the reconstruction of a surface from its gradient field. The gradient field is assumed to be measured, e.g., via Photometric Stereo, and therefore contains either stochastic or systematic error. It is based on the papers [1], [2] and [3]. The following Table contains a list of the functions and their various purposes.

| Function Name      | Purpose                                                       |
|--------------------|---------------------------------------------------------------|
| g2s                | Reconstructs the surface by global least squares (GLS).       |
| g2sSpectral        | GLS with Spectral Regularization                              |
| g2sTikhonov        | GLS with Tikhonov Regularization.                             |
| g2sTikhonovStd     | Tikhonov Regularization, computes $\lambda$                   |
| g2sDirichlet       | GLS with Dirichlet Boundary Conditions                        |
| g2sWeighted        | Weighted Least Squares solution                               |
| g2sTikhonovRTalpha | Preparatory function for g2sTikhonovRT                        |
| g2sTikhonovRT      | Real-time surface reconstruction with Tikhonov Regularization |
| g2sSparse          | Solves the GLS problem with traditional sparse methods        |
| g2sSylvester       | Solves the necessary Sylvester Equation                       |
| g2sTestSurf        | Generates a test surface for testing the algorithms           |

Included with the main functions are auxiliary functions `g2sTestSurf` and `g2sSylvester`, as well as `g2sSparse`, which solves the problem using traditional sparse methods which are common to the literature. It is not recommended to use this function for anything other than comparison purposes.

Note that this package requires the toolbox DOPbox, which is available on MATLAB fileexchange: <http://www.mathworks.com/matlabcentral/fileexchange/41250>

This document was generated automatically from the file `g2sIntro.m` using the `publish2LaTeX` package:

<http://www.mathworks.com/matlabcentral/fileexchange/41207>

## 2 Global Least Squares Solution

Clear the workspace, and change some of the graphics settings.

```
1 close all
2 clear all
3 setUpGraphics(8) ;
```

Set the (discrete) size of the surface, and then generate the test surface:

```
4 m = 156 ;
5 n = 213 ;
6 figure ;
7 [Ztrue,Zx,Zy,x,y] = g2sTestSurf(m,n,'even',1) ;
```

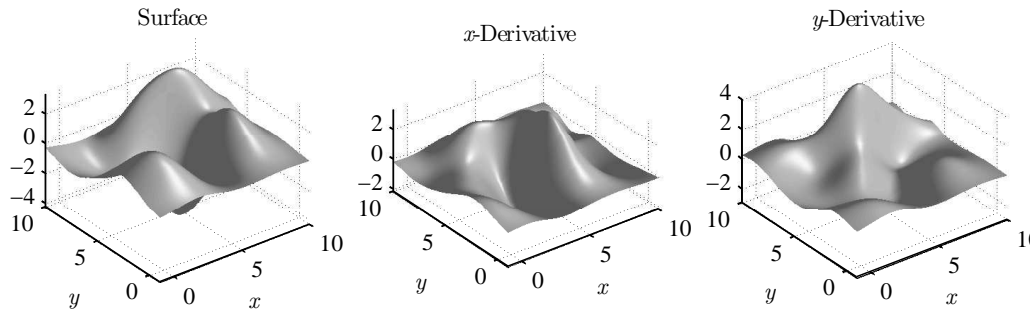

Figure 1: The test surface and its gradient field.

Add noise to the gradient field:

```

8  sigma = 0.05 ;
9  Ax = ( max( Zx(:) ) - min( Zx(:) ) )/2 ;
10 Ay = ( max( Zy(:) ) - min( Zy(:) ) )/2 ;
11 ZxN = Zx + sigma * Ax * randn(m,n) ;
12 ZyN = Zy + sigma * Ay * randn(m,n) ;
13 figure
14 subplot(1,2,1) ;
15 imagesc( x, y, ZxN ) ;
16 axis equal, axis tight
17 subplot(1,2,2) ;
18 imagesc( x, y, ZyN ) ;
19 axis equal, axis tight
20 colormap(gray) ;

```

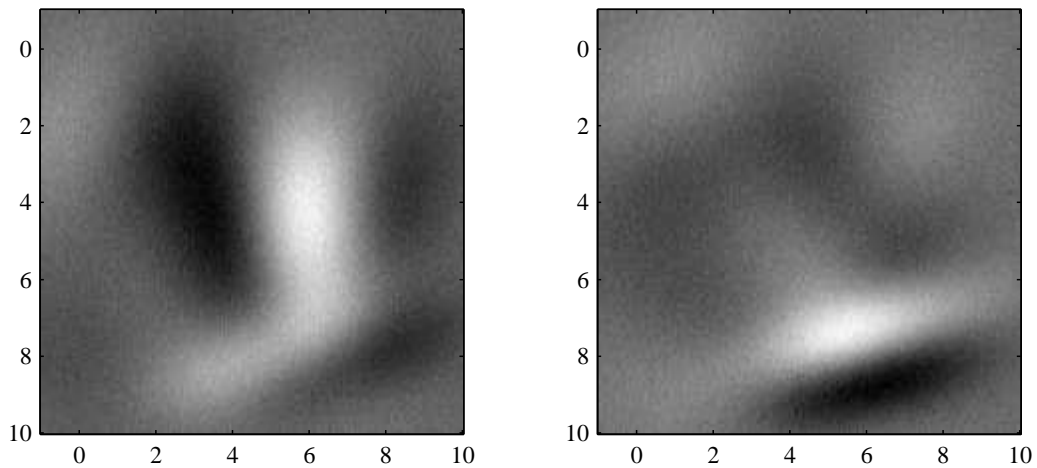

Figure 2: Noisy gradient field: Gaussian noise with a standard deviation that is 5% of the gradient's amplitude.

Set the number of points to be used in the numerical derivatives,  $N$ , and test the basic least squares solution:

```

21 N = 3 ;

```

```

22 tic ;
23 Z = g2s( ZxN, ZyN, x, y, N ) ;
24 tGLS = toc
25 h1 = figure ;
26 subplot(1,2,1) ;
27 g2sPlotSurf( x, y, Z, h1, 'Surface Reconstructed with GLS' ) ;
28 %
29 tic ;
30 warning('off','WarnTests:convertTest') ;
31 % Note: "g2sSparse" is for comparison purposes only, and contains
32 % a warning that you should use "g2s" instead
33 Zsparse = g2sSparse( ZxN, ZyN, x, y, N ) ;
34 warning('on','WarnTests:convertTest') ;
35 tSparse = toc
36 subplot(1,2,2) ;
37 g2sPlotSurf( x, y, Zsparse, h1, 'Reconstruction with Sparse Method' ) ;

```

tGLS =

0.2436

tSparse =

1.2911

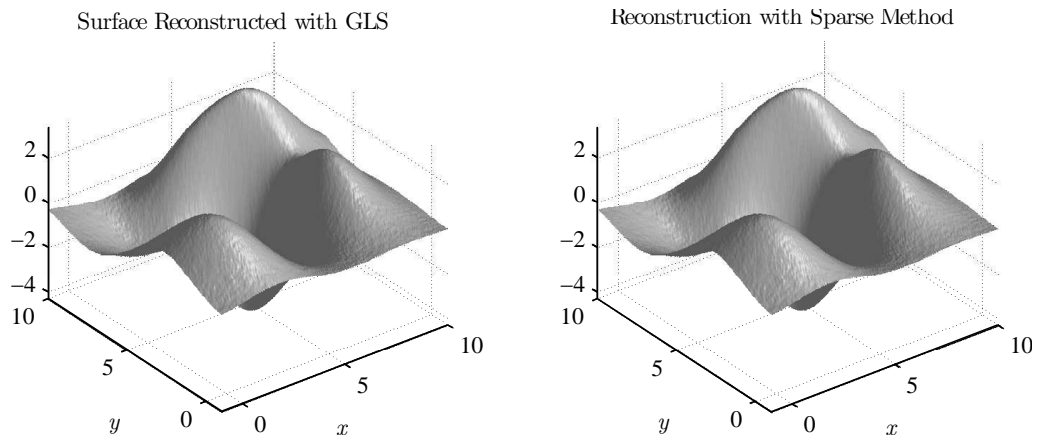

Figure 3: The sparse method solves the GLS problem, however, by vectorizing the system of equations. It is therefore far less efficient (an  $O(n^6)$  algorithm instead of an  $O(n^3)$  algorithm) and less accurate, since using sparse methods only an approximate solution is obtained.

### 3 Spectral Regularization, Constrained Regularization, Weighted Least Squares

For spectral regularization the surface is described by a set of orthogonal basis functions. The regularizing effect is by truncating the set of basis functions by any form of low-, high-, or bandpass-filter. Note that if the full set of basis functions is used (no-filter) the solution is identical to the GLS solution.

```
38 basisFns = 'cosine' ;
39 p = floor(m/4) ;
40 q = floor(n/4) ;
41 Mask = [p,q] ;
42 % The following (comment) produces a band pass mask:
43 %Mask = zeros(m,n) ;
44 %Mask(1:p,1:q) = ones(p,q) ;
45 %Mask(1:2,1:2) = zeros(2) ;
46 Zpoly = g2sSpectral( ZxN, ZyN, x, y, N, Mask, basisFns ) ;
47 h3a = figure ;
48 g2sPlotSurf( x, y, Zpoly, h3a, 'Reconstructed Surface (Spectral)' ) ;
```

## Reconstructed Surface (Spectral)

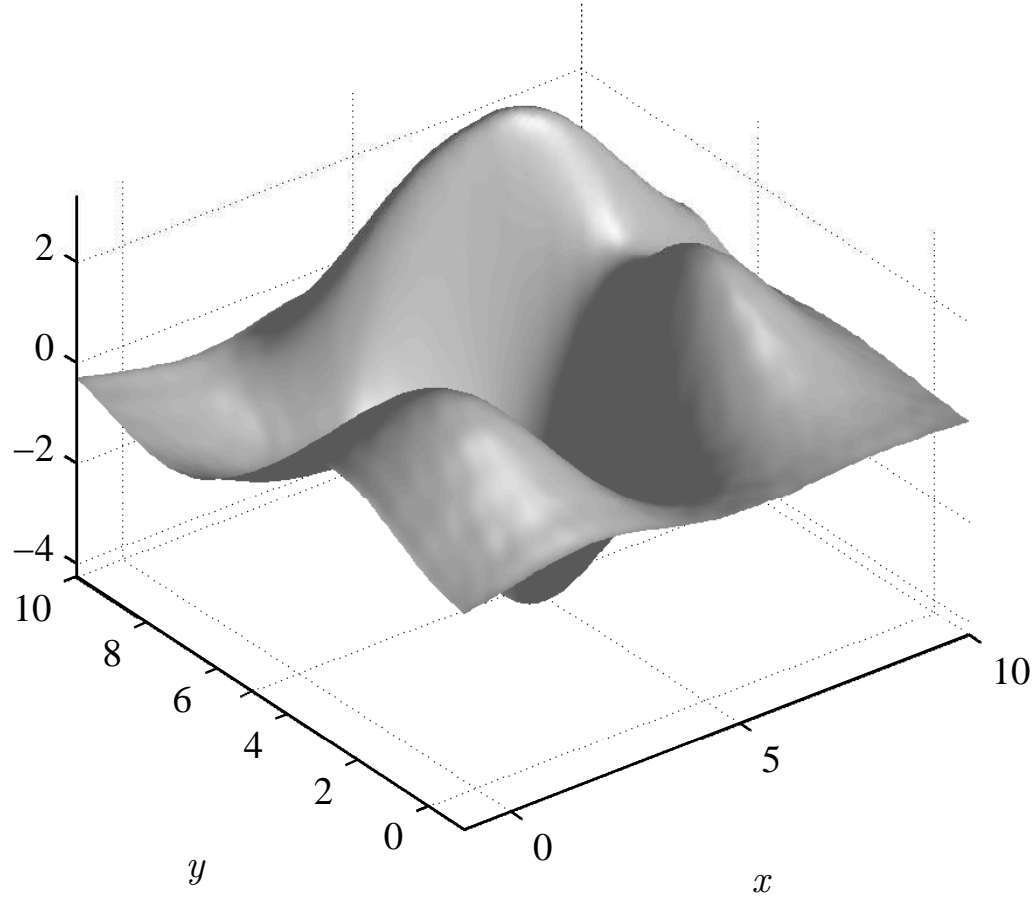

Figure 4: The surface reconstruction using cosine basis functions for spectral regularization. Only one quarter of the low-frequency basis functions are used, effecting a low pass filter which smooths the reconstructed surface. The computation is also more efficient than the full solution.

Dirichlet Boundary Conditions specify the value of the integral surface over the boundary of the domain. This can be used for a regularizing effect, e.g., by setting the boundary values to zero. It is particularly effective and robust to noise if the boundary values are known a-priori.

```
49 ZB = zeros(m,n) ;
50 ZB(1,:) = sin(2*x)' ; ZB(m,:) = sin(2*x) ;
51 ZB(:,1) = sin(2*y) ; ZB(:,n) = sin(2*y) ;
52 Zdir = g2sDirichlet( Zx, Zy, x, y, 5, ZB ) ;
53 figure
54 g2sPlotSurf( x, y, Zdir ) ;
```

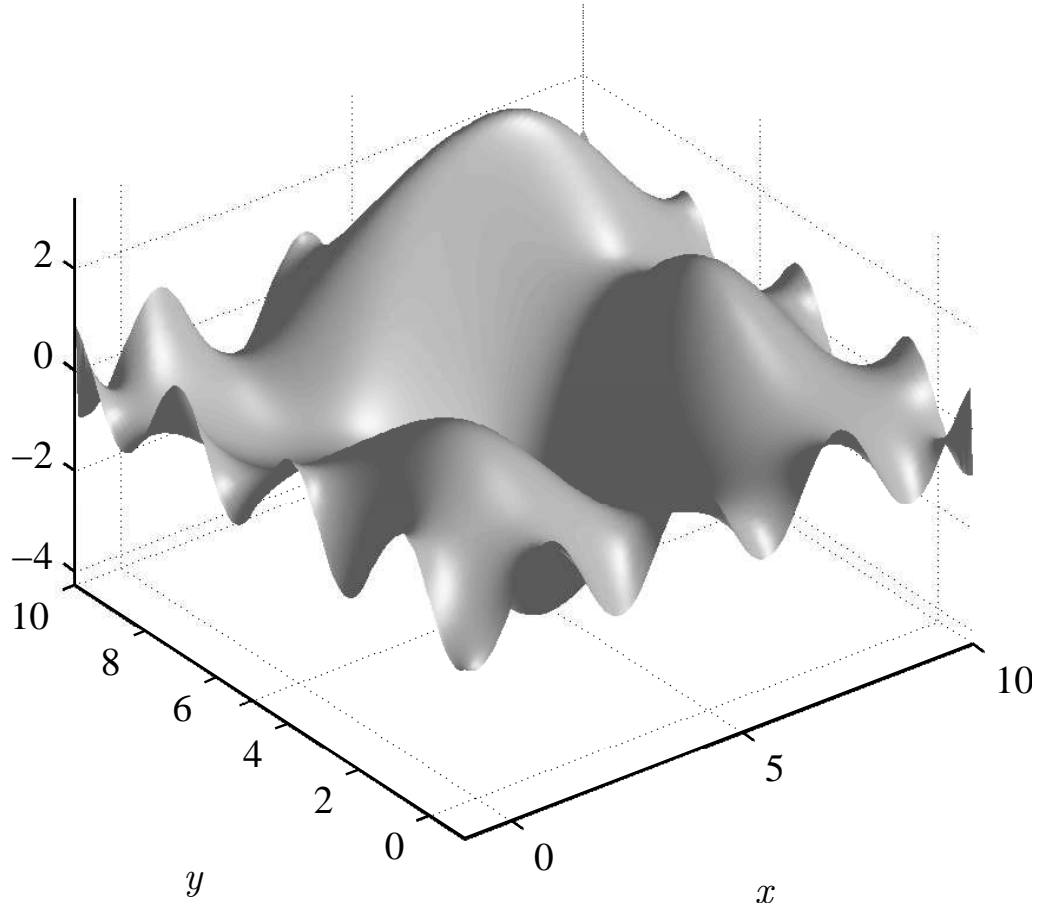

Figure 5: For Dirichlet boundary conditions, the value of the surface at the boundary can be specified arbitrarily, as in this example.

Weighted Least Squares is used when the gradient field is corrupted by heteroscedastic Gaussian noise. This occurs particularly in Photometric Stereo, since one of the main assumptions is that the camera effects an orthographic projection. Since this is not the case, the WLS squares can be used to compensate for this.

```

55 f = 1 + exp( -(x-mean(x)).^2/(2*std(x)^2) ) ; f = f/mean(f) ;
56 g = 1 + exp( -(y-mean(y)).^2/(2*std(y)^2) ) ; g = g/mean(g) ;
57 Lxx = diag( f ) ; Lxy = diag( g ) ;
58 Lyx = diag( f ) ; Lyy = diag( g ) ;
59 ZxNw = Zx + sigma * Ax * sqrtm(Lxy)*randn(m,n)*sqrtm(Lxx) ;
60 ZyNw = Zy + sigma * Ay * sqrtm(Lyy)*randn(m,n)*sqrtm(Lyx) ;
61 ZwLS = g2s( ZxNw, ZyNw, x, y, N ) ;
62 Zw = g2sWeighted( ZxNw, ZyNw, x, y, N, Lxx, Lxy, Lyx, Lyy ) ;
63 h5 = figure ;
64 subplot(1,3,1) ;
65 g2sPlotSurf( x, y, Ztrue, h5, 'Exact' ) ;
66 subplot(1,3,2) ;
67 g2sPlotSurf( x, y, ZwLS, h5, 'GLS' ) ;
68 subplot(1,3,3) ;

```

```
69 g2sPlotSurf( x, y, Zw, h5, 'Weighted LS' ) ;
```

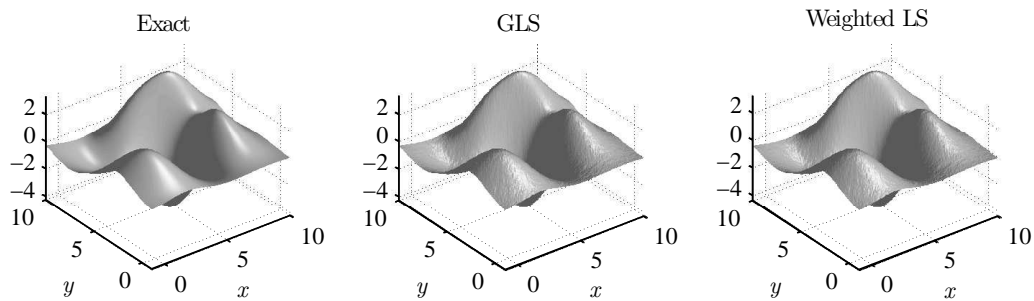

Figure 6: The true surface, and reconstructions from gradient fields subject to heteroscedastic Gaussian noise. In the case the Weighted Least Squares solution is optimal in the Maximum Likelihood sense.

## 4 Tikhonov Regularization

For Tikhonov regularization, if the value of  $\lambda$  is known, the function `g2sTikhonov` can be used, which implements the GLS solution with Tikhonov regularization of arbitrary degree. Tikhonov regularization in “Standard form” is of degree zero, and the a-priori estimate of the surface is `Z0=zeros(m,n)`, i.e., a flat surface.

```
70 lambda = 0.025 ;
71 deg = 0 ;
72 Z0 = zeros(m,n) ;
73 [ Ztik, Res ] = g2sTikhonov( ZxN, ZyN, x, y, N, lambda, deg, Z0 ) ;
74 h3 = figure ;
75 g2sPlotSurf( x, y, Ztik, h3, 'GLS Solution with Tikhonov Regularization'
    ) ;
```



## GLS Solution with Tikhonov Regularization

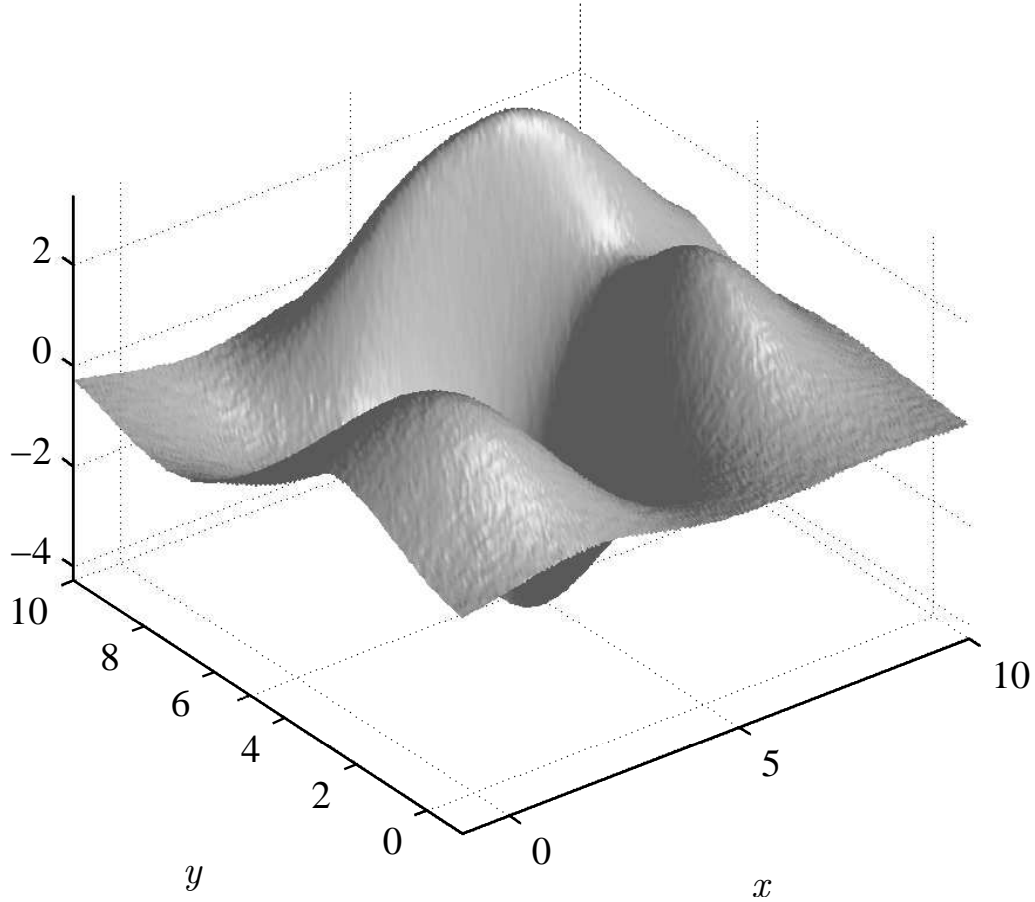

Figure 7: Tikhonov regularization adds a penalty term to the GLS cost function. Depending on the degree of the penalty term, the deviation of the reconstructed surface from the a-priori estimate is penalized, or its first or second derivative equivalents.

To compute a value for  $\lambda$ , use the L-Curve

```

76 noLambdas = 100 ;
77 [ ZtikL, lamOpt, RC, Theta ] = g2sTikhonovStd( Zx, Zy, x, y, N,
          noLambdas, Z0 ) ;
78 %
79 figure
80 loglog( RC(:,2), RC(:,3), 'r.-' ) ;
81 hold on
82 text( RC(1,2), RC(1,3), ['lambda = ', num2str(RC(1,1))] ) ;
83 text( RC(noLambdas,2), RC(noLambdas,3), ['lambda = ', num2str(RC(
          noLambdas,1))] ) ;
84 title('L-Curve') ;

```

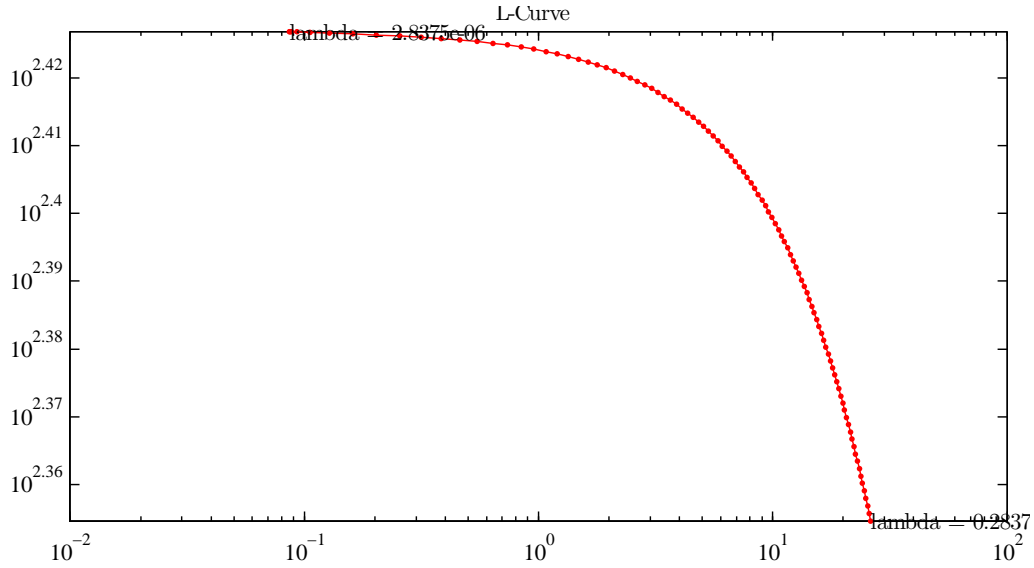

Figure 8: The L-Curve is only one method for determining the regularization parameter for Tikhonov Regularization.

Finally, for Real-Time implementations of Tikhonov, an algorithm has been developed [3] which separates the computation into everything which can be computed beforehand (without the measured gradient field), and the computation which needs to be done in a Real-Time environment. The function `g2sTikhonovRTalpha` makes the preparatory computations based solely on the domain information and the degree of accuracy required. The cell array `S` is then passed on to the Real-Time portions of the code, the function `g2sTikhonovRT`. For this example, with a  $156 \times 213$  surface, the reconstruction time is about 1/10th of the preparatory computation. The relative error between the full algorithm and the real time algorithm is negligibly small.

```

85 tic ;
86 S = g2sTikhonovRTalpha( x, y, N ) ;
87 tPrep = toc
88 %
89 tic
90 ZtikRT = g2sTikhonovRT( ZxN, ZyN, S, lambda, Z0 ) ;
91 tRT = toc
92 %
93 eRel = 100 * norm( ZtikRT - Ztik, 'fro' ) / norm( Ztik, 'fro' )

```

```

tPrep =

    0.0797

```

```

tRT =

    0.0057

```

eRel =

1.7471e-08

## References

- [1] M. Harker and P. O’Leary. Least squares surface reconstruction from measured gradient fields. In *CVPR 2008*, pages 1–7, Anchorage, AK, 2008. IEEE.
- [2] M. Harker and P. O’Leary. Least squares surface reconstruction from gradients: Direct algebraic methods with spectral, Tikhonov, and constrained regularization. In *IEEE CVPR*, pages 2529–2536, Colorado Springs, CO, 2011. IEEE.
- [3] Matthew Harker and Paul OLeary. Direct regularized surface reconstruction from gradients for industrial photometric stereo. *Computers in Industry*, (0):–, 2013.
