# Supplementary material
Source: ML conference proceedings conference paper supplement (https://www.ecva.net/papers/eccv_2020/papers_ECCV/html/123670528_ECCV_2020_paper.php)
Supplement: Supplementary file 5 [file 123670528-supp.zip]

# **DOPbox**

## Demonstration of the Chebyshev Polynomials

Matthew Harker and Paul O’Leary  
Institute for Automation  
University of Leoben  
A-8700 Leoben, Austria  
URL: [automation.unileoben.ac.at](http://automation.unileoben.ac.at)

Original: January 20, 2013  
© 2013

Last Modified: April 11, 2013

### **Contents**

|          |                                                     |          |
|----------|-----------------------------------------------------|----------|
| <b>1</b> | <b>Setting things up</b>                            | <b>2</b> |
| <b>2</b> | <b>Generate the nodes and basis functions</b>       | <b>2</b> |
| <b>3</b> | <b>Determine the quality of the basis functions</b> | <b>2</b> |
| <b>4</b> | <b>Plot the basis functions</b>                     | <b>3</b> |
| <b>5</b> | <b>Plot the matrix of errors</b>                    | <b>3</b> |

# 1 Setting things up

Clear up the workspace

```
1 clear;
2 close all;
3 setUpGraphics;
4 %
5 % Define the number of points and the number of basis functions
6 %
7 noPts = 100;
8 noBfs = 5;
```

# 2 Generate the nodes and basis functions

Generate the Chebyshev nodes

```
9 x = dopNodes( noPts, 'cheby' );
10 %
11 % Setup the first two basis functions
12 %
13 t0 = ones( noPts, 1 );
14 t1 = x;
15 %
16 % Use the Chebyshev recurrence relationship
17 %
18 T = zeros( noPts, noBfs );
19 T(:,1) = t0;
20 T(:,2) = t1;
21 for k=3:noBfs
22     T(:,k) = 2 * x .* T(:,k-1) - T(:,k-2);
23 end;
```

# 3 Determine the quality of the basis functions

The discrete basis functions should form an orthogonal (but not orthonormal) set of basis functions. The Gram matrix is defined as  $\mathbf{G} \triangleq \mathbf{T}^T \mathbf{T}$ .

```
24 G = T' * T;
25 %
26 % Removing the diagonal elements should yield a matrix of
27 % zeros.
28 %
29 Gperp = diag(diag(G)) - G;
30 %
31 % The Frobenius norm of Gperp is now used as a measure of quality for
    the
```

```

32 % basis functions.
33 %
34 e = (norm( Gperp, 'fro' ));
    and the  $n_d = -\log_{10}$  as an estimate for the number of available digits.
35 nd = - log10( e );

```

## 4 Plot the basis functions

Plot the Chebyshev basis functions

```

36 figure
37 plot( x, t1, 'k' );
38 hold on;
39 for k=2:noBfs
40     plot( x, T(:,k), 'k' );
41 end;
42 grid on;
43 xlabel('Support');
44 ylabel('Value');
45 title(['The first n = ',int2str( noBfs ),' Chebyshev basis functions (
        no digits n_d = ',num2str(nd),')']);

```

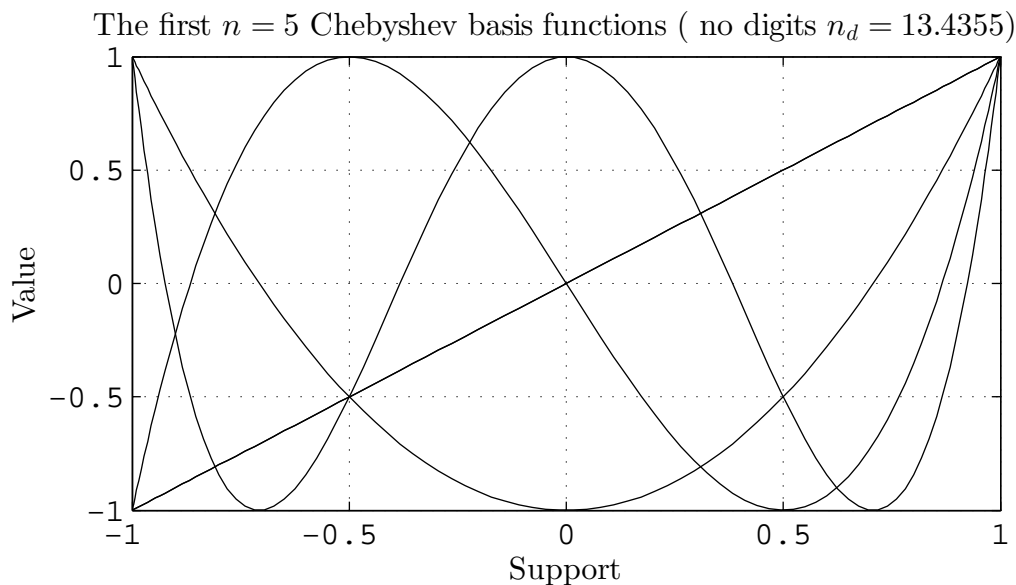

Figure 1: Some Chebyshev polynomials.

## 5 Plot the matrix of errors

Plot the error matrix.

```

46 fig2 = figure;
47 imagesc( Gperp );
48 colorbar;
49 axis image;
50 xlabel('Basis function no. ');
51 ylabel('Basis function no. ');

```

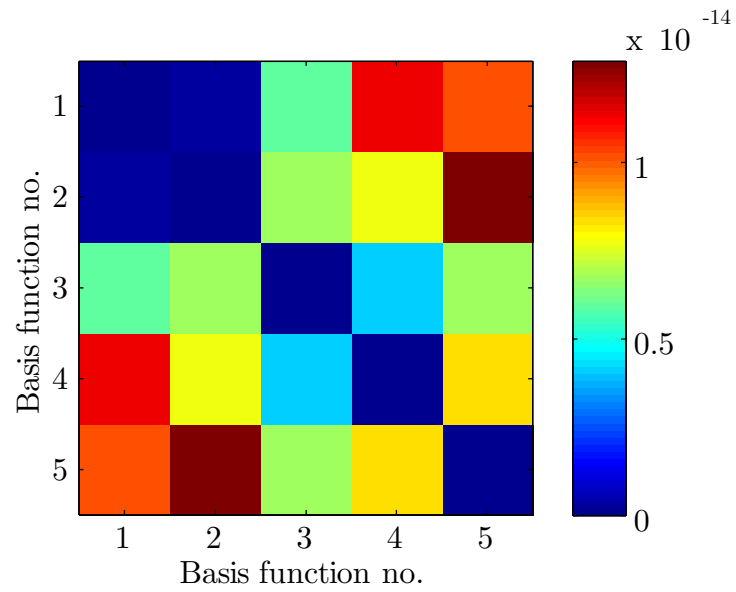

Figure 2: Projection of the basis functions onto their orthogonal complement.
